# Supplementary material for: Integration of a Physiologically Based Pharmacokinetic and Pharmacodynamic Model for Tegoprazan and Its Metabolite: Application for Predicting Food Effect and Intragastric pH Alterations
Source: MDPI journal article supplement (doi:10.3390/pharmaceutics14061298), 2022-06-18
Supplement: s1 [file s1]

# Supplementary Materials: Integration of a Physiologically Based Pharmacokinetic and Pharmacodynamic Model for Tegoprazan and Its Metabolite: Application for Predicting Food Effect and Intra-gastric pH Alterations

Hyeon-Cheol Jeong, Min-Gul Kim, Zhuodu Wei, Kyeong-Ryoon Lee, Jaehyeok Lee, Im-Sook Song and Kwang-Hee Shin

**Table S1.** Intrinsic clearances using recombinant CYPs for tegoprazan and M1

|                   | Slope  | Half-life (min <sup>-1</sup> ) | Intrinsic clearance (μL/min/pmol) |
|-------------------|--------|--------------------------------|-----------------------------------|
| <i>Tegoprazan</i> |        |                                |                                   |
| CYP3A4            | -0.031 | 22.68                          | 0.86                              |
| CYP2C19           | -0.011 | 63.20                          | 0.61                              |
| CYP2C8            | 0.002  | 330.1                          | 0.06                              |
| CYP2C9            | -0.005 | 135.9                          | 0.14                              |
| CYP2D6            | <0.001 | 1,733                          | 0.02                              |
| CYP2E1            | -0.001 | 693.2                          | 0.03                              |
| <i>M1</i>         |        |                                |                                   |
| CYP3A4            | -0.018 | 37.68                          | 0.51                              |
| CYP2C19           | 0.002  | 303.9                          | 0.13                              |
| CYP2C8            | -0.001 | 577.6                          | 0.03                              |
| CYP2C9            | -0.004 | 182.4                          | 0.11                              |
| CYP2D6            | 0.003  | 210.0                          | 0.19                              |
| CYP2E1            | 0.001  | 866.4                          | 0.02                              |

**Table S2.** The predicted arithmetic mean metabolized fraction, absorbed fraction and surface solubility for tegoprazan after single administration of 50 mg tegoprazan in fasted state or at 30 min after high-fat meal.

|                                           | Fast (n=100)  | At 30 min after high-fat meal (n=100) |
|-------------------------------------------|---------------|---------------------------------------|
| <i>Absorbed fraction</i>                  |               |                                       |
| Duodenum                                  | 0.33 ± 0.05   | 0.57 ± 0.09                           |
| Jejunum I                                 | 0.44 ± 0.05   | 0.35 ± 0.06                           |
| Jejunum II                                | 0.17 ± 0.03   | 0.09 ± 0.05                           |
| Ileum I                                   | 0.06 ± 0.01   | 0.02 ± 0.02                           |
| Ileum II                                  | 0.02 ± 0.01   | 0.01 ± 0.01                           |
| Ileum III                                 | 0.01 ± 0      | < 0.01                                |
| Ileum IV                                  | < 0.01        | < 0.01                                |
| Colon                                     | < 0.01        | < 0.01                                |
| <i>Metabolized fraction</i>               |               |                                       |
| Duodenum                                  | 0.01 ± 0.01   | 0.01 ± 0.01                           |
| Jejunum I                                 | 0.01 ± 0.01   | < 0.01                                |
| Jejunum II                                | < 0.01        | < 0.01                                |
| Ileum I                                   | < 0.01        | < 0.01                                |
| Ileum II                                  | < 0.01        | < 0.01                                |
| Ileum III                                 | < 0.01        | < 0.01                                |
| Ileum IV                                  | < 0.01        | < 0.01                                |
| Colon                                     | < 0.01        | < 0.01                                |
| <i>Surface solubility at steady-state</i> |               |                                       |
| Stomach                                   | 964.1 ± 104.3 | 1,107 ± 129.2                         |
| Duodenum                                  | 631.6 ± 164.4 | 886.0 ± 198.0                         |
| Jejunum I                                 | 456.4 ± 150.7 | 443.6 ± 123.0                         |
| Jejunum II                                | 403.6 ± 102.1 | 328.5 ± 72.61                         |
| Ileum I                                   | 261.1 ± 81.69 | 267.0 ± 65.68                         |
| Ileum II                                  | 204.2 ± 79.05 | 212.7 ± 63.22                         |
| Ileum III                                 | 175.8 ± 75.98 | 170.7 ± 55.10                         |
| Ileum IV                                  | 168.0 ± 74.51 | 157.9 ± 55.40                         |
| Colon                                     | 118.8 ± 115.2 | 124.1 ± 115.8                         |

All the parameters were presented as arithmetic mean ± standard deviation.

**Table S3.** The predicted gastric lag time and mean residence time for tegoprazan after single administration of 50 mg tegoprazan in fast state or at 30 min after high-fat meal.

|                                 | Fast (n=100)      | At 30 min after high-fat meal<br>(n=100) |
|---------------------------------|-------------------|------------------------------------------|
| <i>Fluid and Dissolved Drug</i> |                   |                                          |
| Gastric lag time (h)            | 0                 | 0                                        |
| Gastric MRT (h)                 | $0.27 \pm 0.09$   | $0.73 \pm 0.62$                          |
| Small intestine MRT (h)         | $3.39 \pm 0.30$   | $4.07 \pm 1.38$                          |
| Colon MRT (h)                   | $45.16 \pm 24.02$ | $43.56 \pm 21.74$                        |
| <i>Fine Particles</i>           |                   |                                          |
| Gastric lag time (h)            | 0                 | 0                                        |
| Gastric MRT (h)                 | $0.27 \pm 0.10$   | $0.72 \pm 0.60$                          |
| Small intestine MRT (h)         | $3.40 \pm 0.31$   | $3.91 \pm 1.07$                          |
| Colon MRT (h)                   | $44.23 \pm 22.38$ | $45.34 \pm 22.87$                        |

MRT: mean residence time

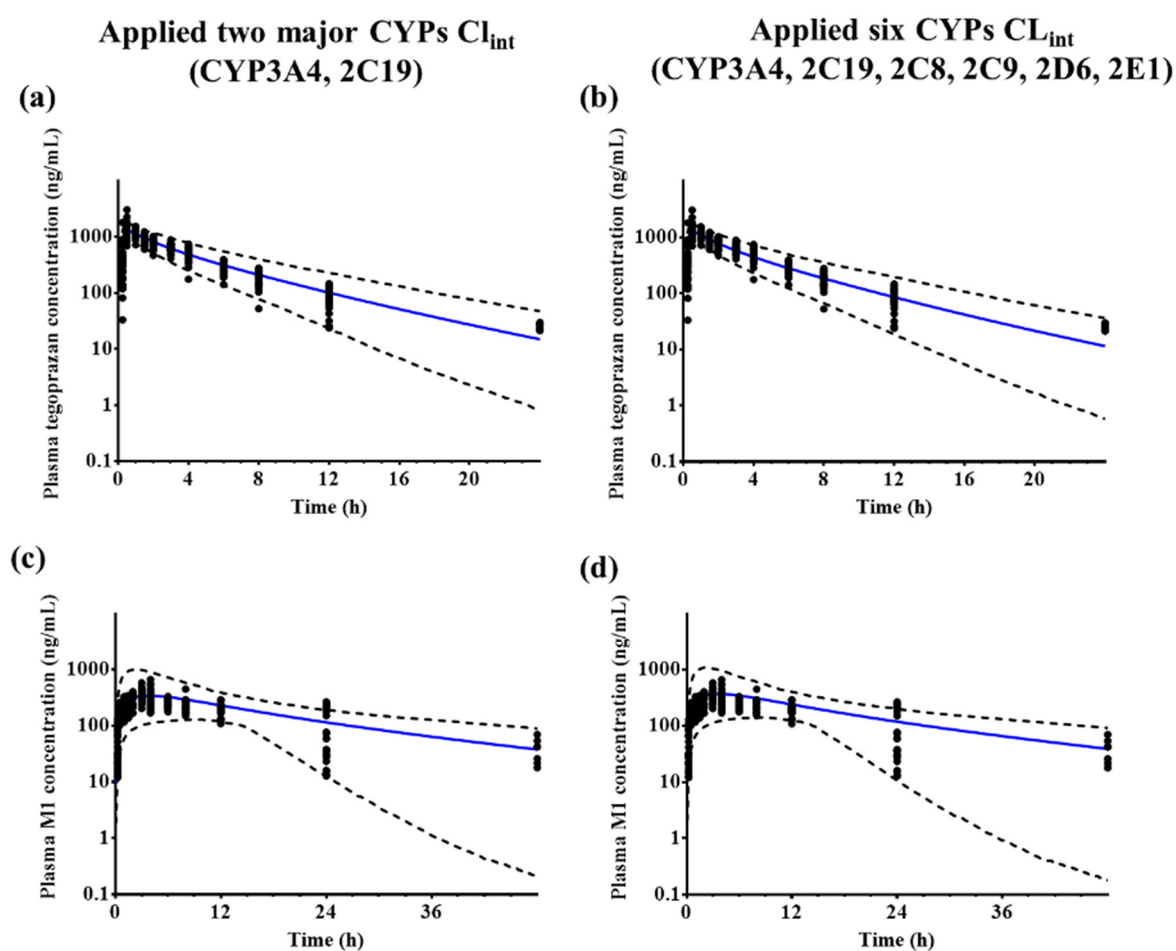

**Figure S1.** Predicted plasma (a, b) tegoprazan and (c, d) M1 concentration-time profiles after a single administration of 100 mg of tegoprazan. Blue solid lines and black dotted lines represent predicted mean concentrations and their 95<sup>th</sup> and 5<sup>th</sup> percentiles, respectively. Two major CYPs represent CYP3A4 and 2C19, and six CYPs represent CYP3A4, 2C19, 2C8, 2C9, 2D6, and 2E1
